# Supplementary material for: Uncertain Analysis of Fuzzy Evaluation Model for Water Resources Carrying Capacity: A Case Study in Zanhuang County, North China Plain
Source: MDPI journal article supplement (doi:10.3390/w13202804), 2021-10-09
Supplement: s1 [file s1]

# Supplementary Materials

**Table S1**  
**Evaluation criteria of 1-9 scale method.**

| Scale Method | 1                                    | 3                                                 | 5                                        | 7                                                 | 9                                                      | 2,4,6,8                                      |
|--------------|--------------------------------------|---------------------------------------------------|------------------------------------------|---------------------------------------------------|--------------------------------------------------------|----------------------------------------------|
| Definition   | Factor I is as important as factor J | Factor I is slightly more important than factor J | Factor I is more important than factor J | Factor I is strongly more important than factor J | Factor I is significantly more important than factor J | Intermediate state of two adjacent judgments |

**Table S2**  
**The judgment matrix of four subsystems.**

| Criterion Layer | A   | B   | C   | D |
|-----------------|-----|-----|-----|---|
| A               | 1   | 2   | 3   | 4 |
| B               | 1/2 | 1   | 1/3 | 3 |
| C               | 1/3 | 3   | 1   | 2 |
| D               | 1/4 | 1/3 | 1/2 | 1 |
